# Supplementary material for: The Strength of T Cell Receptor Signal Controls the Polarization of Cytotoxic Machinery to the Immunological Synapse
Source: PubMed Central journal article supplement (PMC2791175; doi:10.1016/j.immuni.2009.08.024), 2009-10-16
Supplement: mmc1.pdf [file mmc1.pdf]

## Supplemental Data

### The Strength of T Cell Receptor Signal Controls the Polarization of Cytotoxic Machinery to the Immunological Synapse

Misty R. Jenkins, Andy Tsun, Jane C. Stinchcombe, and Gillian M. Griffiths

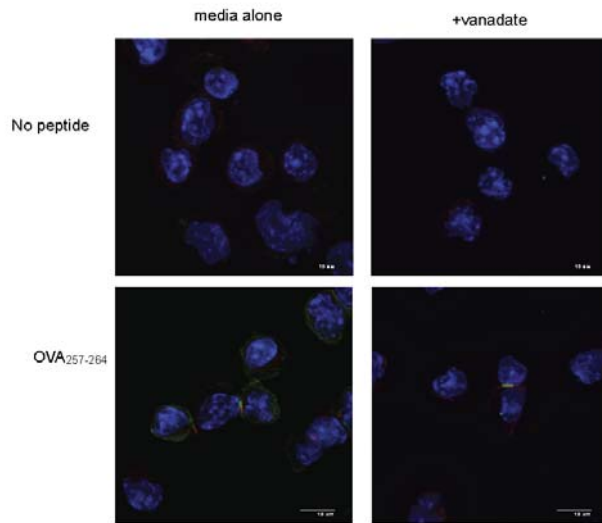

**Figure S1. Orthovanadate Treatment Does Not Affect pY416 Staining in OT-1 Cells in the Absence of Peptide**

Target EL4 cells were left untreated (no peptide) or pulsed with 1 $\mu$ M of OVA<sub>257-264</sub> peptide and conjugated to *in vitro* activated OT-I cells with or without 100 $\mu$ M sodium orthovanadate. Cells were labeled with anti-Lck (488, green), pY416 (546, red) and nuclei stained with Hoechst (blue). Confocal images of a field of conjugates shown as a projection through the xy plane. Scale bars, 10 $\mu$ M.

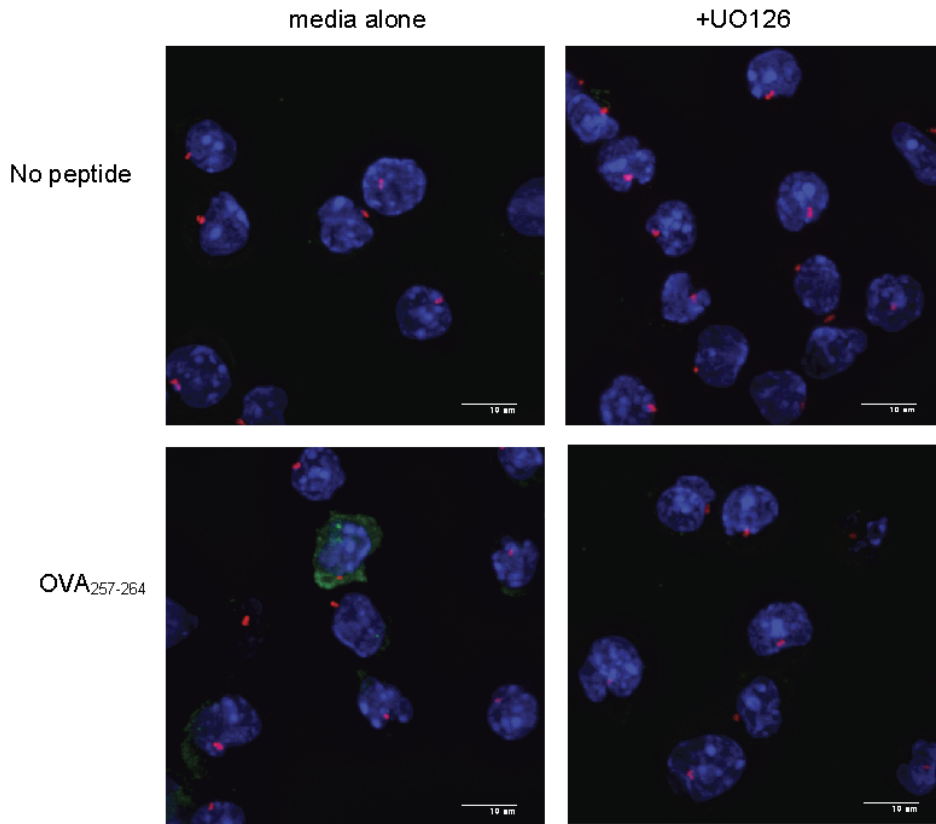

**Figure S2. Preincubation of OT-1 Cells with the MEK Inhibitor, UO126, Abolishes Staining with Anti-pERK**

Target EL4 cells were left untreated (no peptide) or pulsed with 1 $\mu$ M of OVA<sub>257-264</sub> peptide and conjugated to *in vitro* activated OT-I cells with or without 10 $\mu$ M of the MEK inhibitor, UO126. Cells were labeled with anti-pERK (488, green),  $\gamma$ -tubulin (546, red) and nuclei stained with Hoechst (blue). Confocal images of a field of conjugates shown as a projection through the xy plane. Scale bars, 10 $\mu$ M.
